# Supplementary material for: Glycophagy is an ancient bilaterian pathway supporting metabolic adaptation through STBD1 structural evolution
Source: Research Square preprint supplement (doi:10.21203/rs.3.rs-6392273/v1), 2025-04-28
Supplement: Supplementary file 1 [file 12f747a1be6d7aaa27c4a30c.xlsx]

## Sheet: Data S1
Data S1. Source data corresponding to Figure 1.
Figure 1D
Estimated protein levels of STBD1 and p62 during fasting and refeeding.
Tinme points	STBD1 protein level (fold changes related to β-actin)	Average value	Standard deviation	p62 protein level (fold changes related to β-actin)	Average value	Standard deviation
0d-1	0.86	0.813333	0.0450925	0.8	0.833333	0.0416333
0d-2	0.77			0.82
0d-3	0.81			0.88
F3d-1	0.31	0.393333	0.12741	0.82	0.786667	0.0288675
F3d-2	0.33			0.77
F3d-3	0.54			0.77
F7d-1	0.24	0.216667	0.106927	0.83	0.81	0.034641
F7d-2	0.1			0.77
F7d-3	0.31			0.83
F14d-1	0.12	0.12	0.03	0.85	0.82	0.0264575
F14d-2	0.09			0.8
F14d-3	0.15			0.81
R6h-1	0.93	0.98	0.0781025	0.85	0.853333	0.0251661
R6h-2	0.94			0.83
R6h-3	1.07			0.88
R12h-1	0.64	0.71	0.0754983	0.88	0.81	0.07
R12h-2	0.7			0.74
R12h-3	0.79			0.81
R24h-1	0.58	0.696667	0.125831	0.8	0.78	0.0264575
R24h-2	0.68			0.75
R24h-3	0.83			0.79
R48h-1	0.28	0.273333	0.100167	0.89	0.846667	0.0378594
R48h-2	0.17			0.83
R48h-3	0.37			0.82
Tukey's multiple comparisons test	Mean Diff.	95.00% CI of diff.	Summary	Adjusted P Value
STBD1
0d vs. F3d	0.42	0.2325 to 0.6075	****	<0.0001
0d vs. F7d	0.59	0.4025 to 0.7775	****	<0.0001
0d vs. F14d	0.69	0.5025 to 0.8775	****	<0.0001
0d vs. R6h	-0.17	-0.3575 to 0.01748	ns	0.0981
0d vs. R12h	0.1	-0.08748 to 0.2875	ns	0.67
0d vs. R24h	0.11	-0.07748 to 0.2975	ns	0.5604
0d vs. R48h	0.54	0.3525 to 0.7275	****	<0.0001
Tukey's multiple comparisons test	Mean Diff.	95.00% CI of diff.	Summary	Adjusted P Value
p62
0d vs. F3d	0.04	-0.1475 to 0.2275	ns	0.9967
0d vs. F7d	0.02	-0.1675 to 0.2075	ns	>0.9999
0d vs. F14d	0.01	-0.1775 to 0.1975	ns	>0.9999
0d vs. R6h	-0.02	-0.2075 to 0.1675	ns	>0.9999
0d vs. R12h	0.02	-0.1675 to 0.2075	ns	>0.9999
0d vs. R24h	0.05	-0.1375 to 0.2375	ns	0.9873
0d vs. R48h	-0.02	-0.2075 to 0.1675	ns	>0.9999

## Sheet: Data S2
Data S2. Source data corresponding to Figure 2.
Figure 2D
Estimated protein levels of STBD1 in complex with either LC3A, LC3C, GABARAP or GABARAPL2, respectively.
Interactive Atg8 family member	Combined STBD1 protein level (fold changes related to GAPDH)	Average value	Standard deviation
LC3A-1	0.45	0.575	0.176777
LC3A-2	0.7
LC3C-1	0.154	0.158	0.00565685
LC3C-2	0.162
GABARAP-1	0.19	0.171	0.0268701
GABARAP-2	0.152
GABARAPL2-1	1.161	1.323	0.229103
GABARAPL2-2	1.485
	P value
LC3A vs. LC3C	0.01506
LC3A vs. GABARAP	0.017352
LC3A vs. GABARAPL2	0.011016
LC3C vs. GABARAP	0.458842
LC3C vs. GABARAPL2	0.000918
GABARAP vs. GABARAPL2	0.000983

## Sheet: Data S3
Data S3. Source data corresponding to Figure 3.
Figure 3F						Figure 3G
							Estimated abundance of protein levels for STBD1 from mouse, zebrafish, wide-type M. gigas and a mutant M. gigas STBD1 overexpressed in 293T cells with or without EBSS treatments.
							Treatments	STBD1 proteins	STBD1 protein level expressed in 293T cells (fold changes related to GAPDH)	Average value	Standard deviation
							Control	MmSTBD1-1	0.99	0.916667	0.0665833
								MmSTBD1-2	0.86
								MmSTBD1-3	0.9
								DrSTBD1-1	0.49	0.436667	0.0472582
								DrSTBD1-2	0.42
								DrSTBD1-3	0.4
								CgSTBD1-1	1.16	1.14667	0.070946
								CgSTBD1-2	1.07
								CgSTBD1-3	1.21
								CgSTBD1_mutant-1	1.24	1.14333	0.119304
								CgSTBD1_mutant-2	1.01
								CgSTBD1_mutant-3	1.18
							EBSS	MmSTBD1-1	0.79	0.696667	0.100664
								MmSTBD1-2	0.71
								MmSTBD1-3	0.59
								DrSTBD1-1	0.27	0.226667	0.0585947
								DrSTBD1-2	0.25
								DrSTBD1-3	0.16
								CgSTBD1-1	0.32	0.206667	0.105987
								CgSTBD1-2	0.19
								CgSTBD1-3	0.11
								CgSTBD1_mutant-1	0.59	0.43	0.147309
Estimated abundance of binding between glycogen and STBD1 from mouse, zebrafish, wide-type M. gigas and a mutant M. gigas STBD1.								CgSTBD1_mutant-2	0.4
Treatments	Groups	STBD1 proteins	STBD1 protein level bound to glycogen (fold changes related to PET32a vector)	Average value	Standard deviation			CgSTBD1_mutant-3	0.3
Glycogen-	Input	MmSTBD1-1	1.538	1.33867	0.235373
		MmSTBD1-2	1.079				Šídák's multiple comparisons test	Mean Diff.	95.00% CI of diff.	Summary	Adjusted P Value
		MmSTBD1-3	1.399				Control - EBSS
		DrSTBD1-1	1.121	1.285	0.144042		Vector	0	-0.1971 to 0.1971	ns	>0.9999
		DrSTBD1-2	1.343				MmSTBD1	0.22	0.02291 to 0.4171	*	0.0241
		DrSTBD1-3	1.391				DrSTBD1	0.21	0.01291 to 0.4071	*	0.0332
		CgSTBD1-1	1	1.17433	0.169707		CgSTBD1	0.94	0.7429 to 1.137	****	<0.0001
		CgSTBD1-2	1.184				CgSTBD1_mutant	0.71	0.5129 to 0.9071	****	<0.0001
		CgSTBD1-3	1.339
		CgSTBD1_mutant-1	0.968	1.134	0.19997		Tukey's multiple comparisons test	Mean Diff.	95.00% CI of diff.	Summary	Adjusted P Value
		CgSTBD1_mutant-2	1.078				EBSS
		CgSTBD1_mutant-3	1.356				Vector vs. MmSTBD1	-0.7	-0.9080 to -0.4920	****	<0.0001
	Supernatant	MmSTBD1-1	1.295	1.13567	0.180913		Vector vs. DrSTBD1	-0.23	-0.4380 to -0.02205	*	0.0257
		MmSTBD1-2	0.939				Vector vs. CgSTBD1	-0.21	-0.4180 to -0.002050	*	0.0471
		MmSTBD1-3	1.173				Vector vs. CgSTBD1_mutant	-0.43	-0.6380 to -0.2220	****	<0.0001
		DrSTBD1-1	1.614	1.33967	0.237963		MmSTBD1 vs. DrSTBD1	0.47	0.2620 to 0.6780	****	<0.0001
		DrSTBD1-2	1.216				MmSTBD1 vs. CgSTBD1	0.49	0.2820 to 0.6980	****	<0.0001
		DrSTBD1-3	1.189				MmSTBD1 vs. CgSTBD1_mutant	0.27	0.06205 to 0.4780	**	0.0073
		CgSTBD1-1	1.609	1.36867	0.208207		DrSTBD1 vs. CgSTBD1	0.02	-0.1880 to 0.2280	ns	0.9984
		CgSTBD1-2	1.243				DrSTBD1 vs. CgSTBD1_mutant	-0.2	-0.4080 to 0.007950	ns	0.063
		CgSTBD1-3	1.254				CgSTBD1 vs. CgSTBD1_mutant	-0.22	-0.4280 to -0.01205	*	0.0349
		CgSTBD1_mutant-1	1.819	1.47333	0.301009
		CgSTBD1_mutant-2	1.269
		CgSTBD1_mutant-3	1.332
	Pellet	MmSTBD1-1	0	0	0
		MmSTBD1-2	0
		MmSTBD1-3	0
		DrSTBD1-1	0	0	0
		DrSTBD1-2	0
		DrSTBD1-3	0
		CgSTBD1-1	0	0	0
		CgSTBD1-2	0
		CgSTBD1-3	0
		CgSTBD1_mutant-1	0	0	0
		CgSTBD1_mutant-2	0
		CgSTBD1_mutant-3	0
Glycogen+	Input	MmSTBD1-1	1.568	1.242	0.28621
		MmSTBD1-2	1.032
		MmSTBD1-3	1.126
		DrSTBD1-1	1.499	1.30233	0.17779
		DrSTBD1-2	1.255
		DrSTBD1-3	1.153
		CgSTBD1-1	1.277	1.18767	0.0861936
		CgSTBD1-2	1.181
		CgSTBD1-3	1.105
		CgSTBD1_mutant-1	1.04	1.03133	0.0436501
		CgSTBD1_mutant-2	0.984
		CgSTBD1_mutant-3	1.07
	Supernatant	MmSTBD1-1	0	0	0
		MmSTBD1-2	0
		MmSTBD1-3	0
		DrSTBD1-1	0	0	0
		DrSTBD1-2	0
		DrSTBD1-3	0
		CgSTBD1-1	0	0	0
		CgSTBD1-2	0
		CgSTBD1-3	0
		CgSTBD1_mutant-1	0	0	0
		CgSTBD1_mutant-2	0
		CgSTBD1_mutant-3	0
	Pellet	MmSTBD1-1	0.902	0.950333	0.232302
		MmSTBD1-2	1.203
		MmSTBD1-3	0.746
		DrSTBD1-1	0.956	0.753333	0.178231
		DrSTBD1-2	0.621
		DrSTBD1-3	0.683
		CgSTBD1-1	2.036	2.02867	0.178113
		CgSTBD1-2	1.847
		CgSTBD1-3	2.203
		CgSTBD1_mutant-1	1.558	1.35267	0.365215
		CgSTBD1_mutant-2	1.569
		CgSTBD1_mutant-3	0.931
Tukey's multiple comparisons test	Mean Diff.	95.00% CI of diff.	Summary	Adjusted P Value
Pellet-Glycogen(+)
MmSTBD1 vs. DrSTBD1	0.196	-0.1832 to 0.5752	ns	0.5205
MmSTBD1 vs. CgSTBD1	-1.079	-1.458 to -0.6998	****	<0.0001
MmSTBD1 vs. CgSTBD1_mutant	-0.403	-0.7822 to -0.02382	*	0.0333
DrSTBD1 vs. CgSTBD1	-1.275	-1.654 to -0.8958	****	<0.0001
DrSTBD1 vs. CgSTBD1_mutant	-0.599	-0.9782 to -0.2198	***	0.0006
CgSTBD1 vs. CgSTBD1_mutant	0.676	0.2968 to 1.055	****	0.0001
